# Supplementary material
Source: ML conference proceedings conference paper supplement (https://aclanthology.org/2026.semeval-1.441)

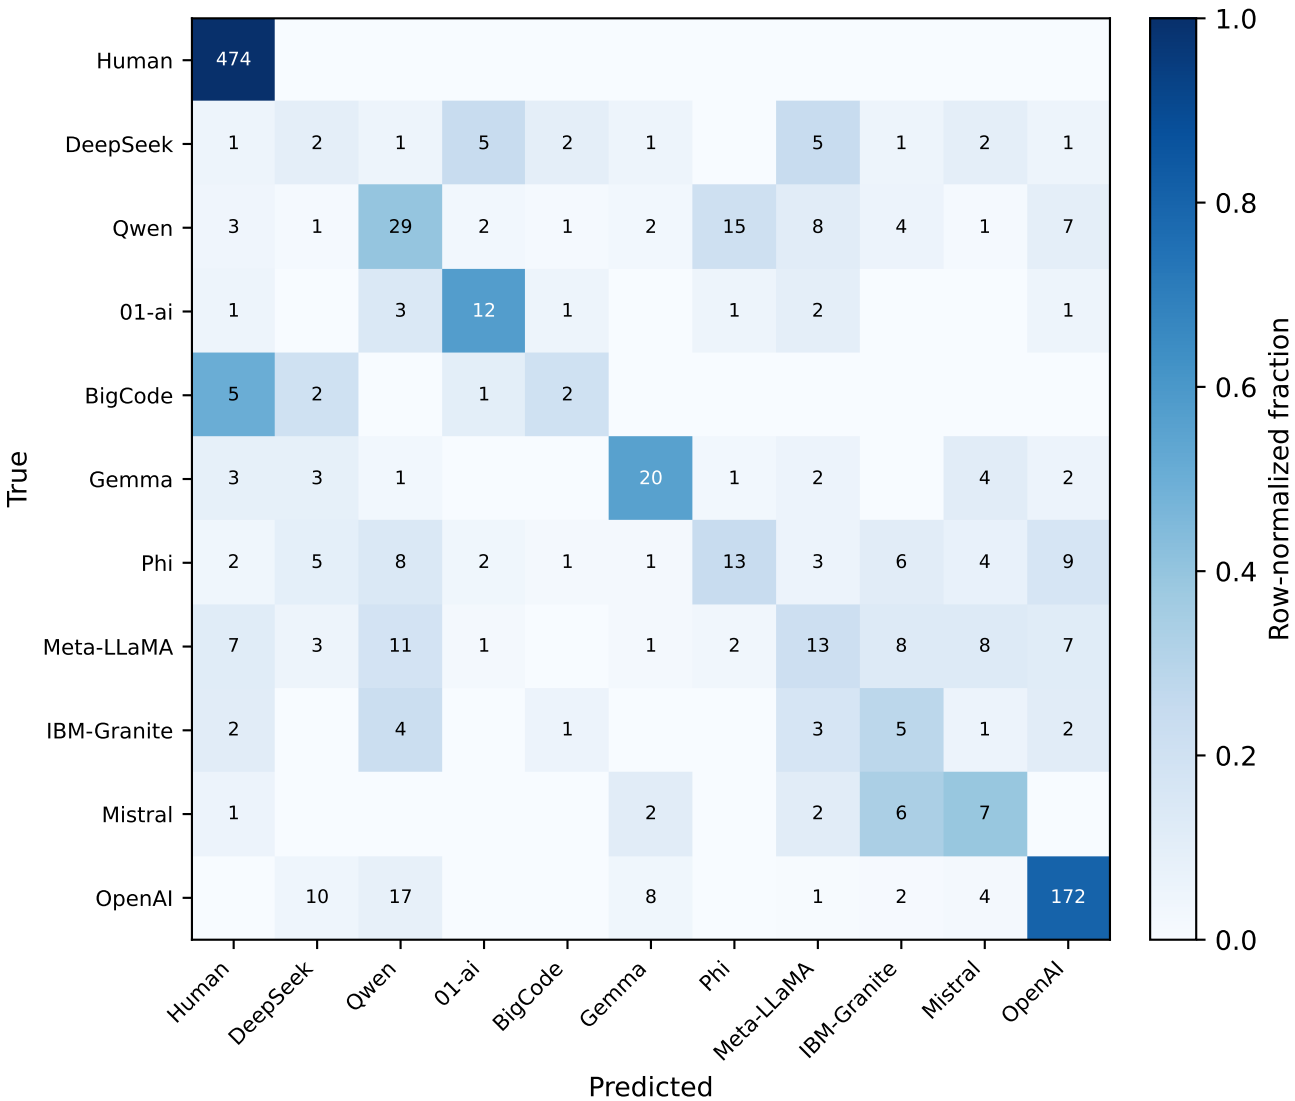

Supplement: SupplementaryMaterial [file confusion_matrix.pdf › figures/confusion_matrix.pdf]
